# Supplementary material for: Comparative Investigation on the Soil Burial Degradation Behaviour of Polymer Films for Agriculture before and after Photo-Oxidation
Source: PubMed Central journal article supplement (PMC7240387; doi:10.3390/polym12040753), 2020-03-30
Supplement: polymers-12-00753-s001.pdf [file polymers-12-00753-s001.pdf]

## Comparative Investigation on the Soil Burial Degradation Behaviour of Polymer Films for Agriculture before and after Photo-Oxidation

Francesco Paolo La Mantia <sup>1,2,\*</sup>, Laura Ascione <sup>2</sup>, Maria Chiara Mistretta <sup>1</sup>, Marco Rapisarda <sup>3</sup> and Paola Rizzarelli <sup>3,\*</sup>

| Sample | Photo-oxidation time (h) | Soil burial degradation time (days) |                                                                                       |
|--------|--------------------------|-------------------------------------|---------------------------------------------------------------------------------------|
| B1     | 0                        | 125                                 |    |
|        | 40                       | 125                                 |    |
| B2     | 0                        | 125                                 |   |
|        | 56                       | 125/95 <sup>1</sup>                 |  |
| PE-OXO | 0                        | 125                                 |  |
|        | 168                      | 125                                 |  |
| PE     | 0                        | 125                                 |  |
|        | 2400                     | 125                                 |  |

**Figure S1.** Photo-oxidation and soil burial degradation intervals, and some representative photographs of the film samples recovered after the burial test. <sup>1</sup>After 125 days of soil burial test, B2 samples were completely disintegrated. Photographs refer to fragment recovered after 95 days of degradation in soil.

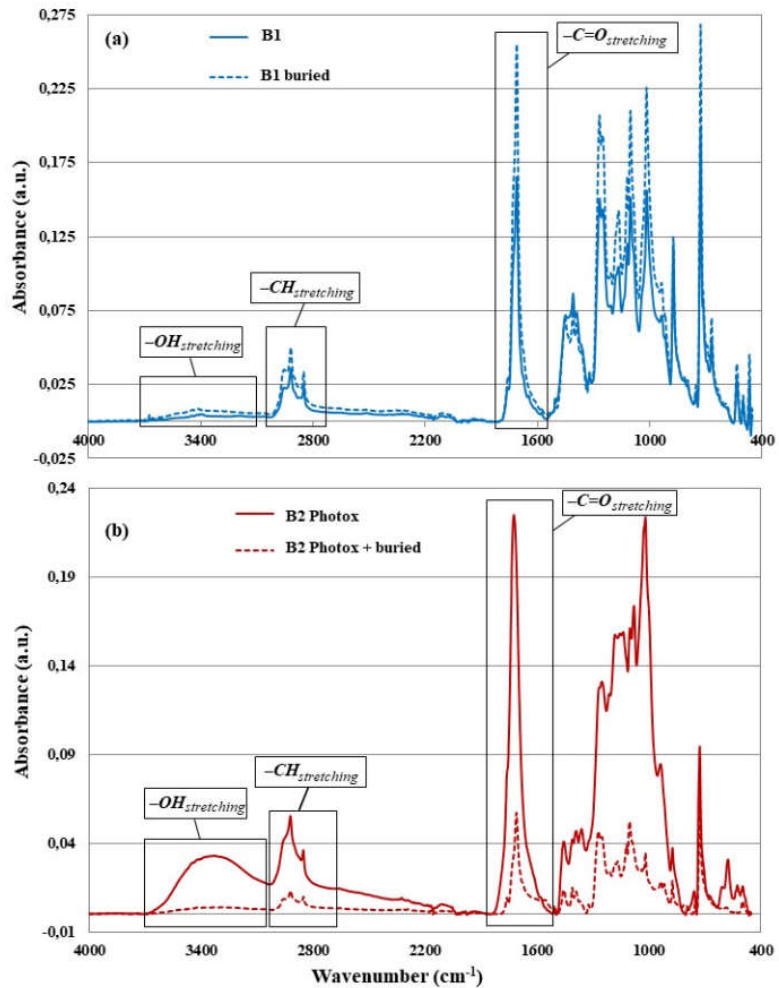

**Figure S2.** Examples of selected Attenuated Total Reflection (ATR)-FTIR spectra: **(a)** virgin and buried B1 sample; **(b)** photo-oxidized and photo-oxidized + buried B2 sample. B1 = Ecovio<sup>®</sup>-based and B2 = commercial Mater Bi<sup>®</sup>-based films. After 125 days of soil burial test, B2 samples, photo-oxidized 56 h, were completely disintegrated. ATR-FTIR spectrum refers to B2 samples, photo-oxidized 30 h and recovered after 125 days of degradation in soil.

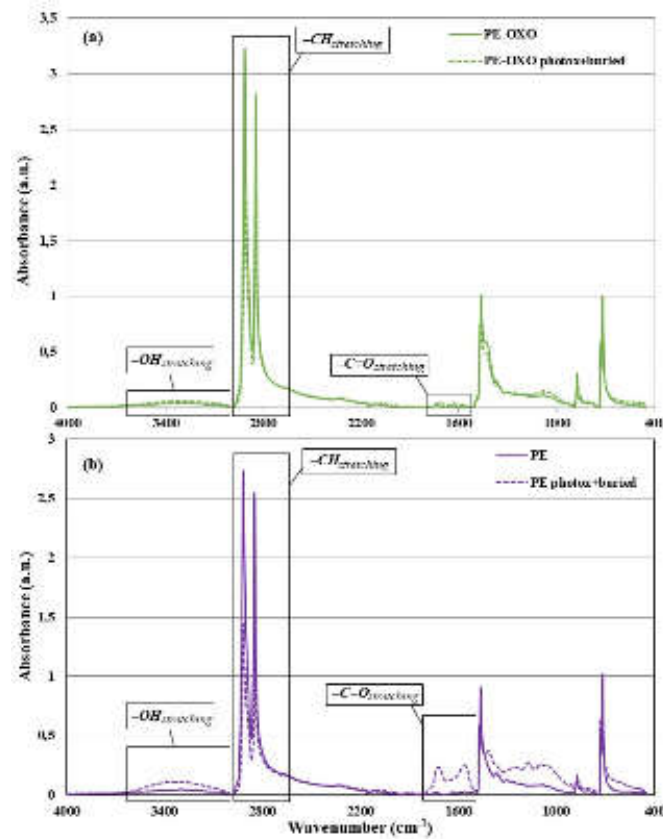

**Figure S3.** Examples of selected ATR-FTIR spectra: photo-oxidized and photo-oxidized + buried (a) PE-OXO and (b) PE samples.

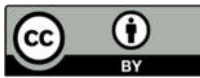

© 2020 by the authors. Submitted for possible open access publication under the terms and conditions of the Creative Commons Attribution (CC BY) license (<http://creativecommons.org/licenses/by/4.0/>).
